# Supplementary material for: Synthesis of new, UV-photoactive dansyl derivatives for flow cytometric studies on bile acid uptake
Source: Royal Society of Chemistry journal article supplement (doi:10.1039/b912134j), 2009-01-01

## Supporting Information

### Synthesis of New, UV-Photoactive Dansyl Derivatives for Flow Cytometric Studies on Bile Acid Uptake

Jana Rohacova,<sup>a</sup> M. Luisa Marin,<sup>a</sup> Alicia Martinez-Romero,<sup>b</sup> José-Enrique O'Connor,<sup>b</sup> M. Jose Gomez-Lechon,<sup>c,d</sup> M. Teresa Donato,<sup>c,d,e</sup> José V. Castell,<sup>c,d,e</sup> Miguel A. Miranda<sup>a,\*</sup>

<sup>a</sup>Instituto de Tecnología Química-Departamento de Química (UPV-CSIC); <sup>b</sup>Laboratorio de Citómica, Unidad Mixta CIPF-UVEG, Centro de Investigación Príncipe Felipe; <sup>c</sup>Unidad de Hepatología Experimental, Centro de Investigación Hospital Universitario "La Fe"; <sup>d</sup>CIBERHEPAD, FIS; <sup>e</sup>Departamento de Bioquímica y Biología Molecular, Facultad de Medicina (UVEG). Valencia, Spain

\*mmiranda@qim.upv.es

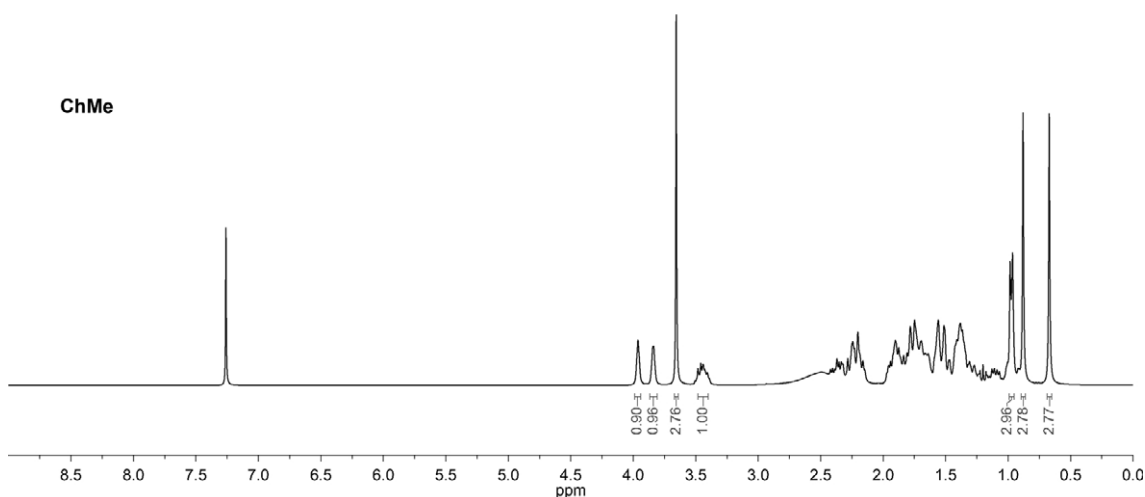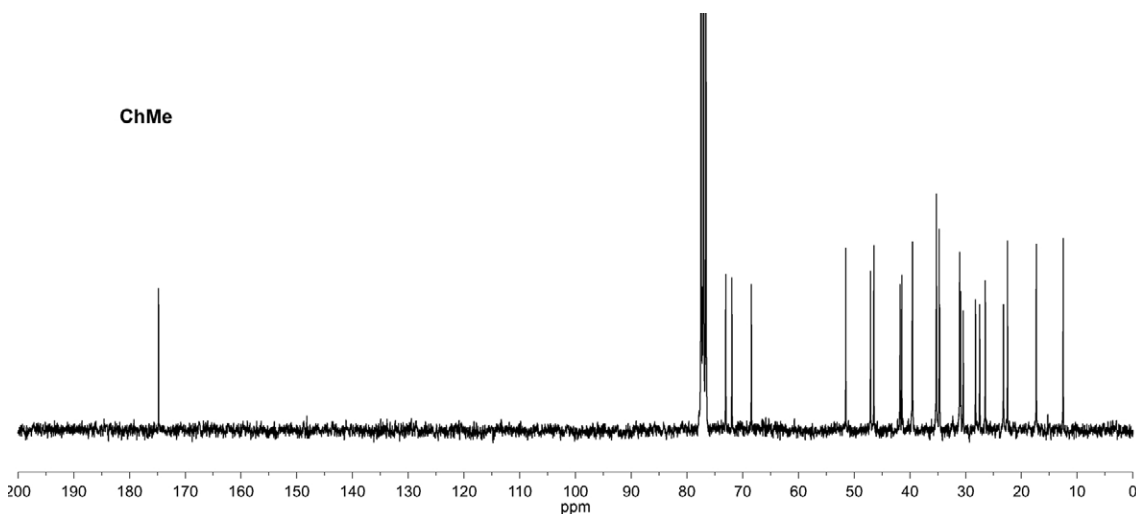

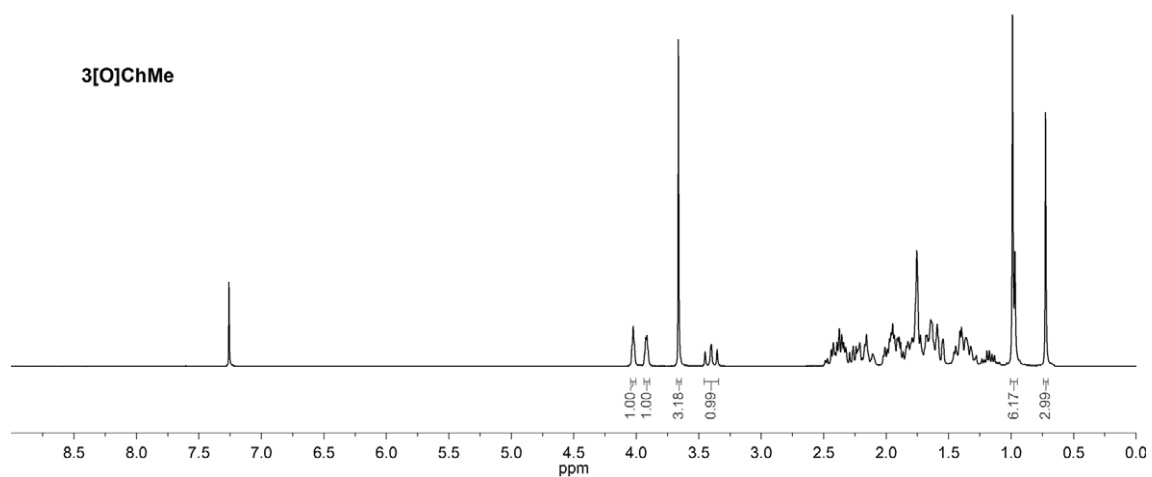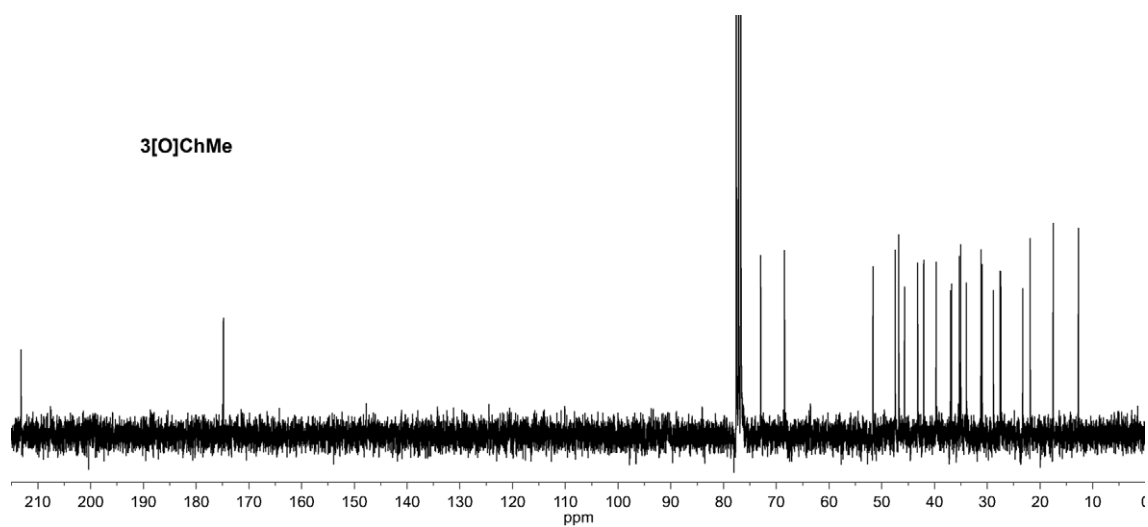

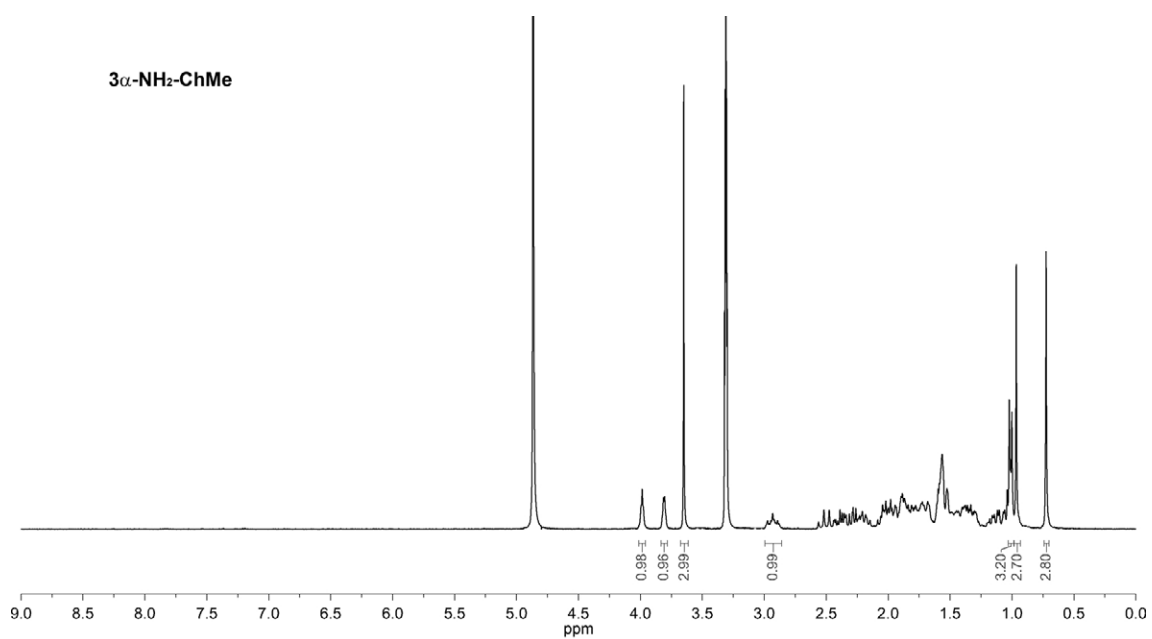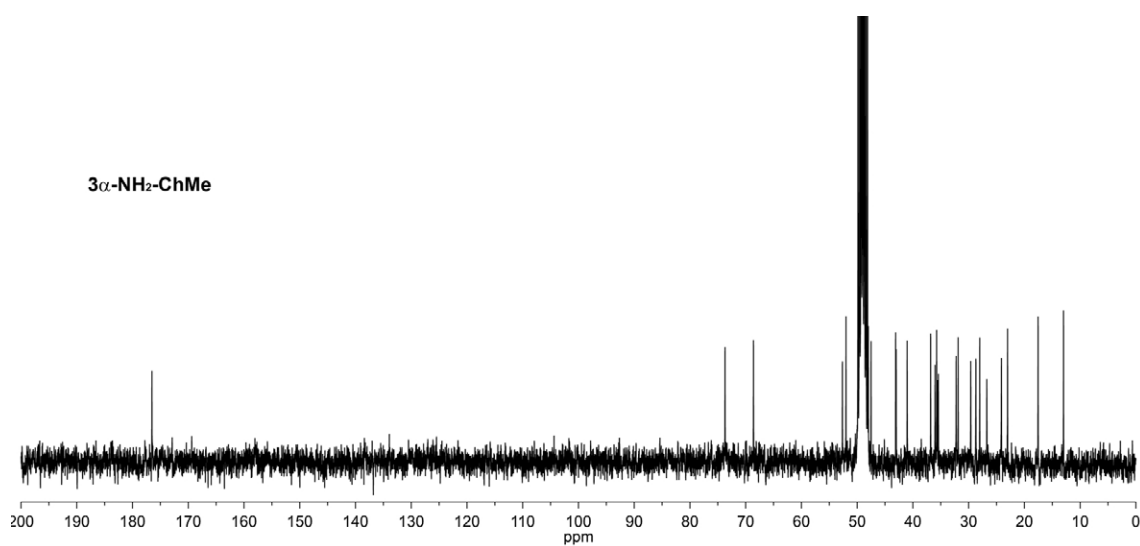

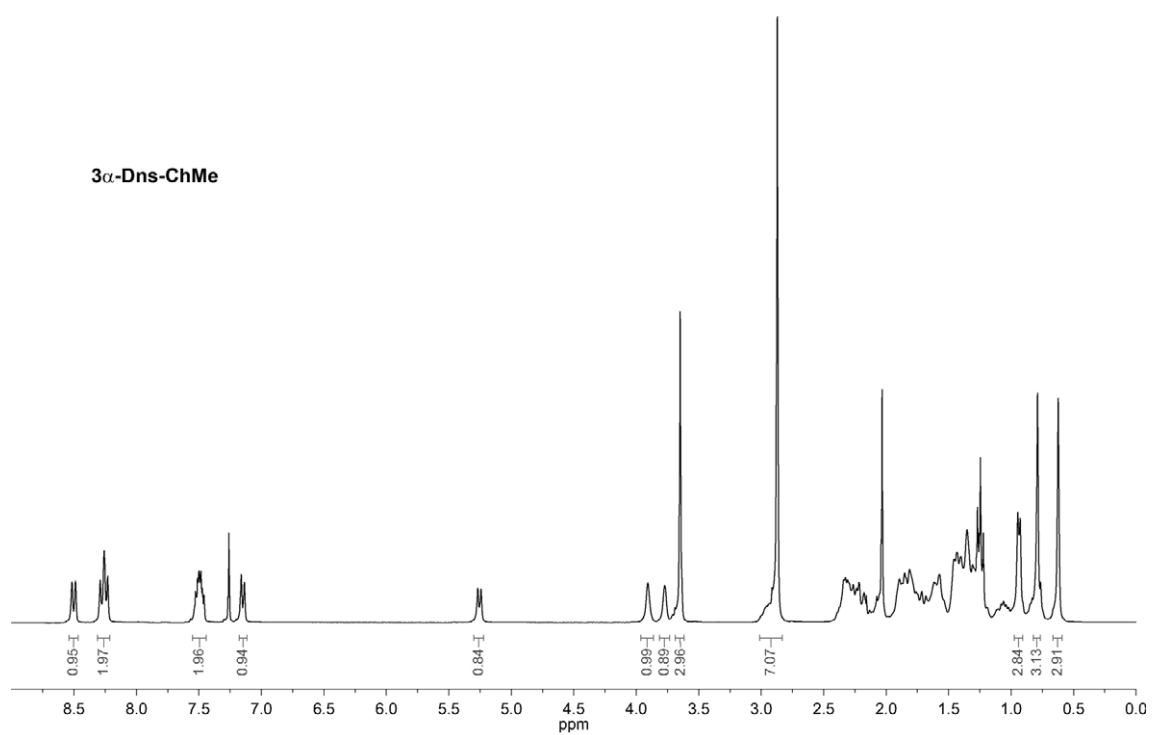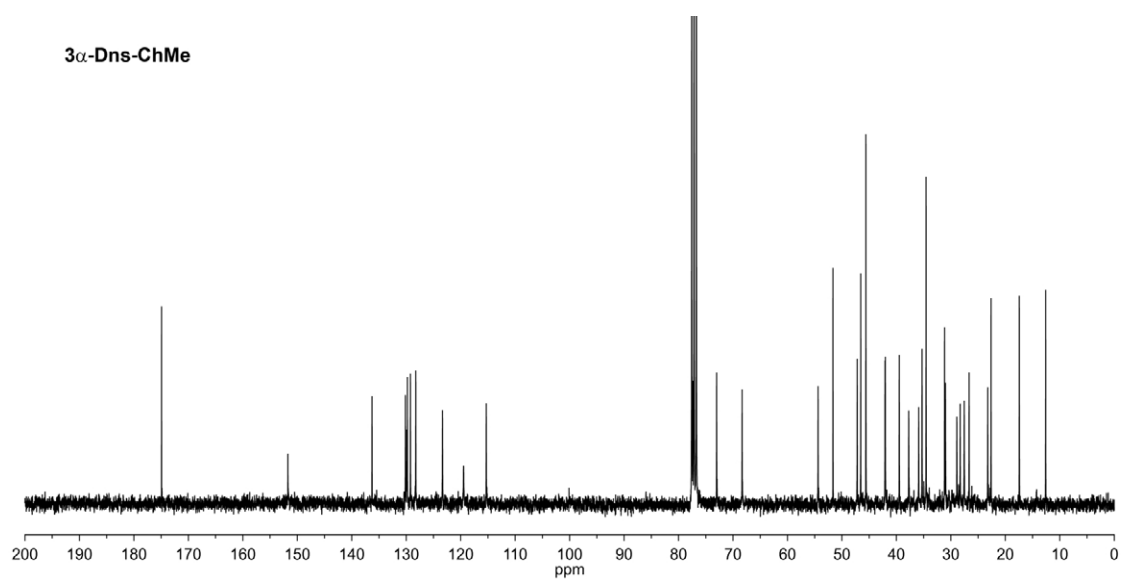

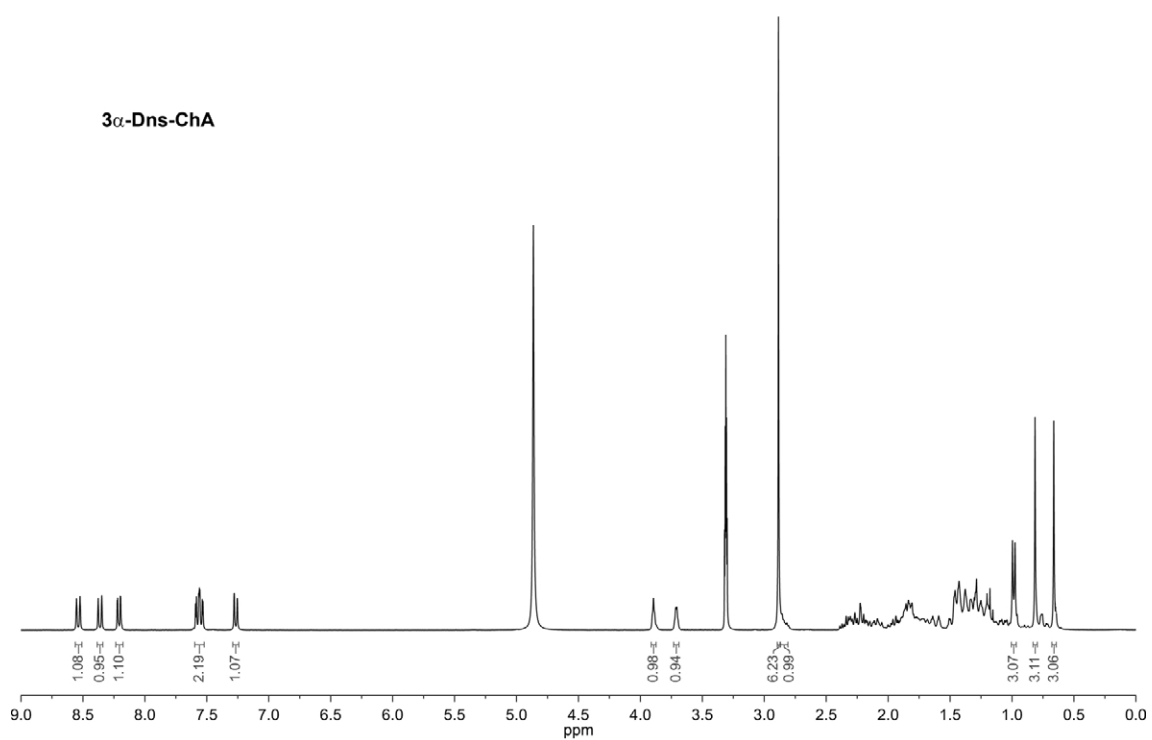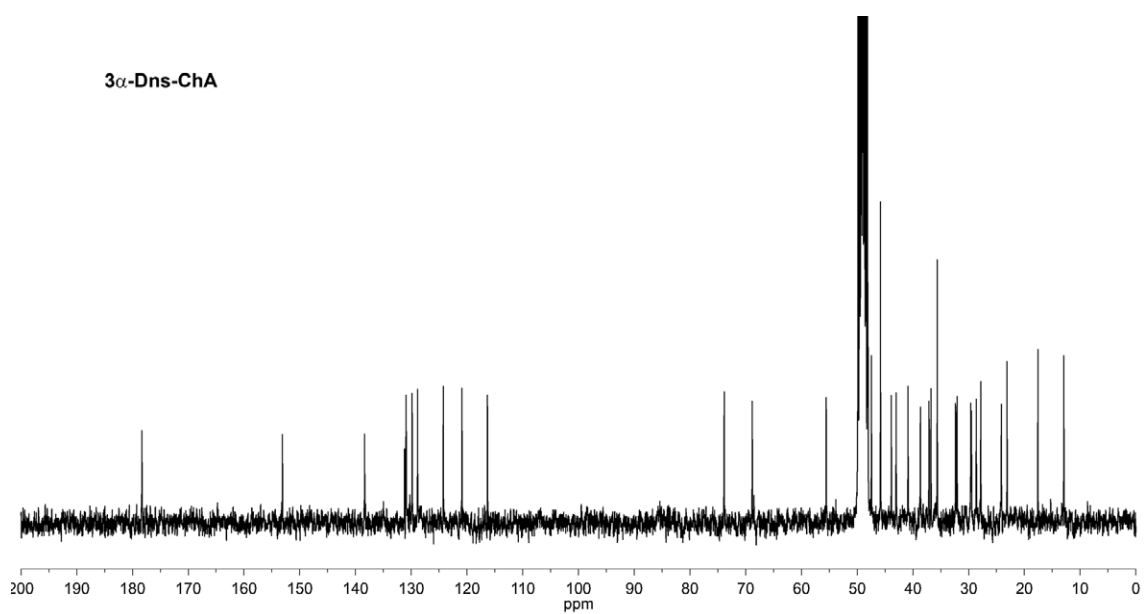

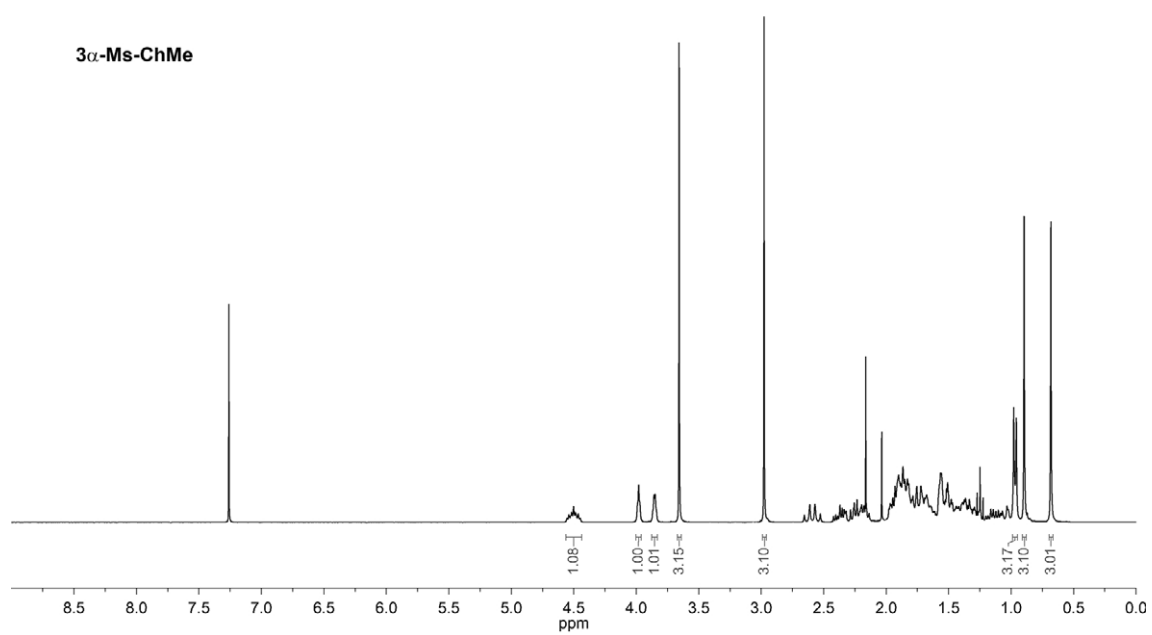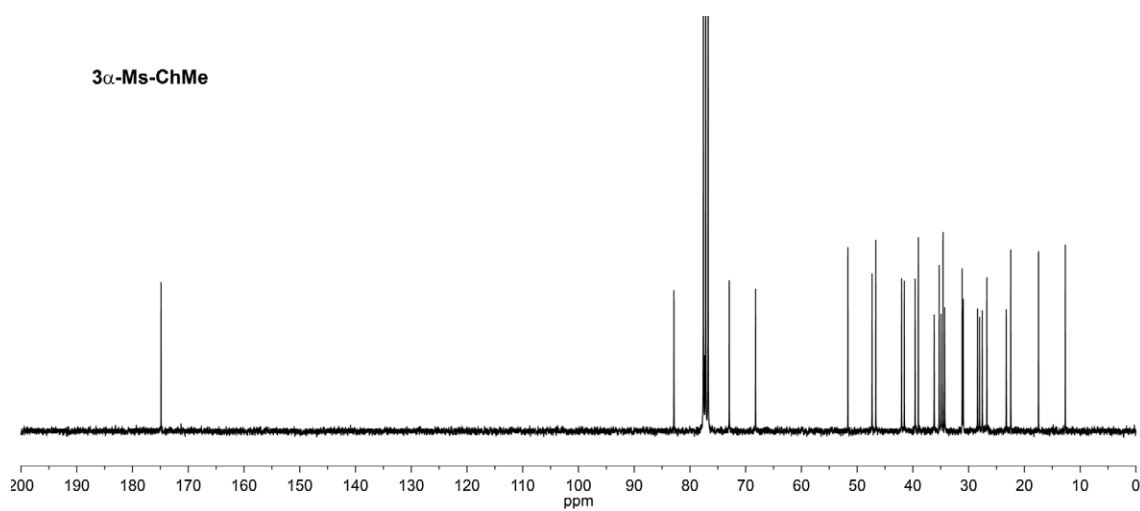

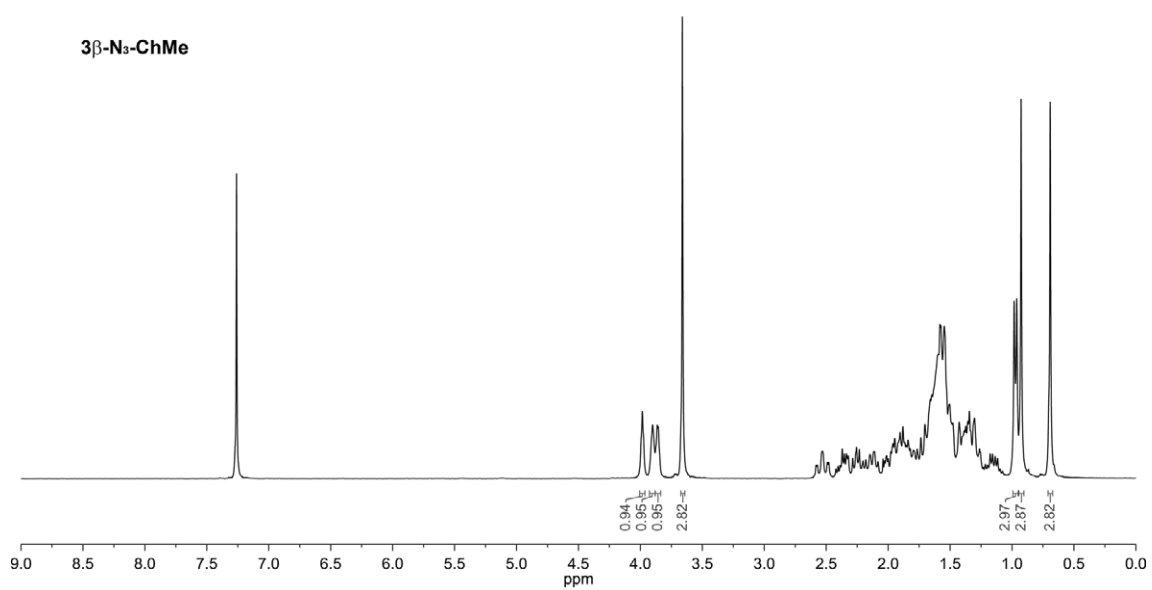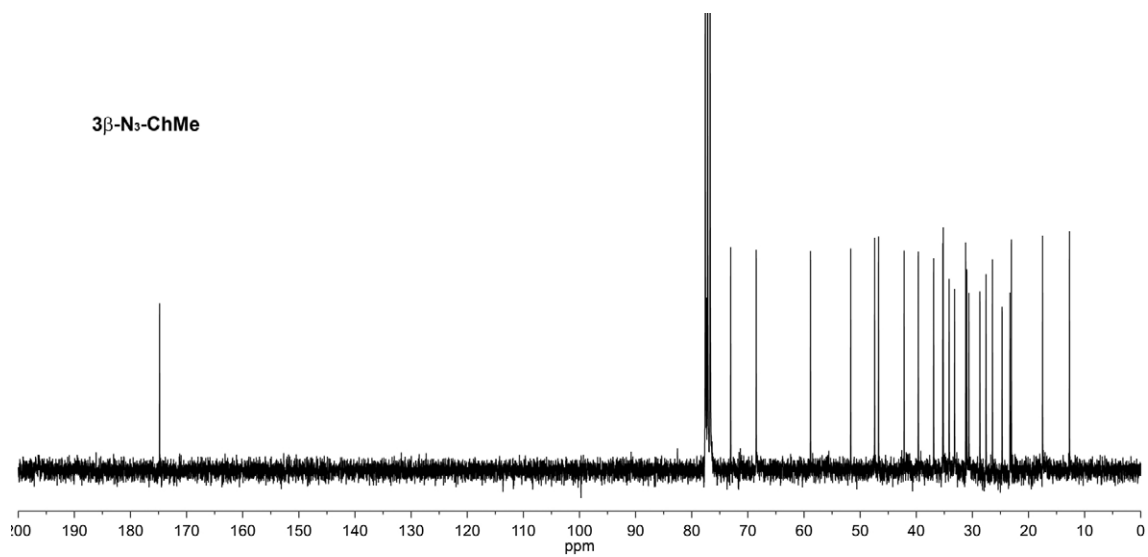

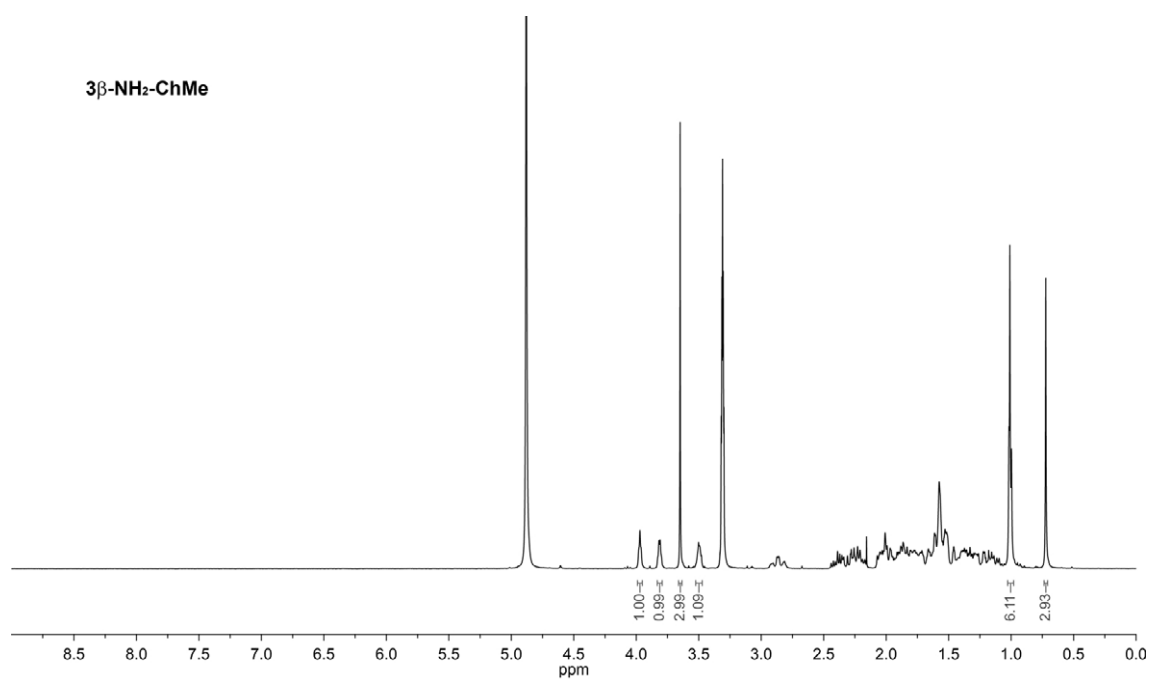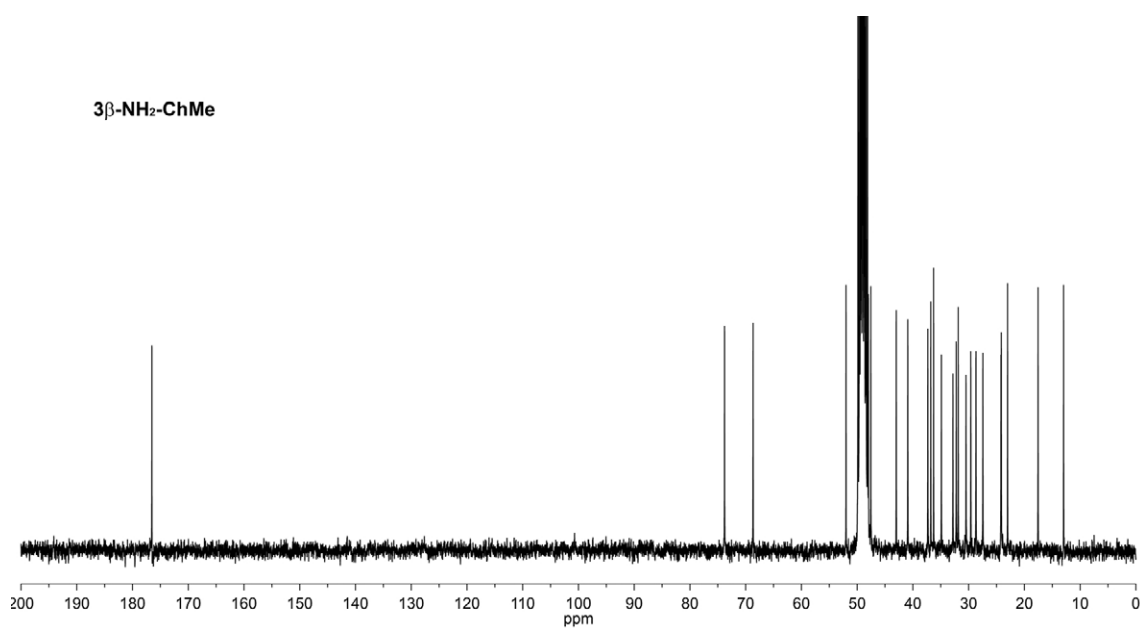



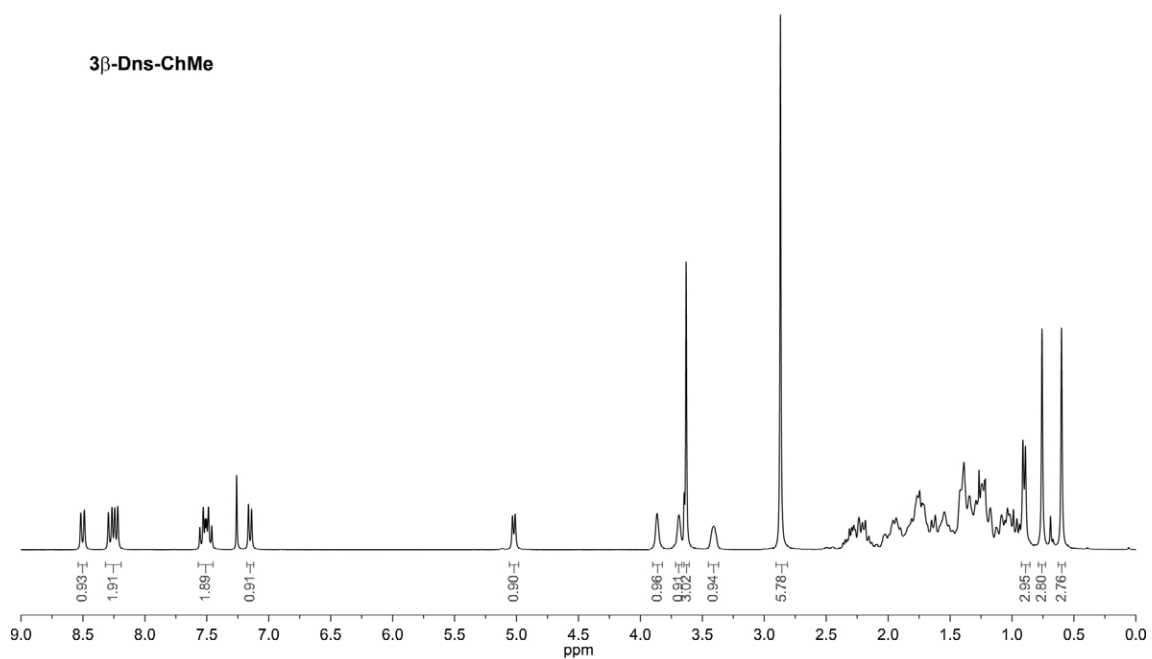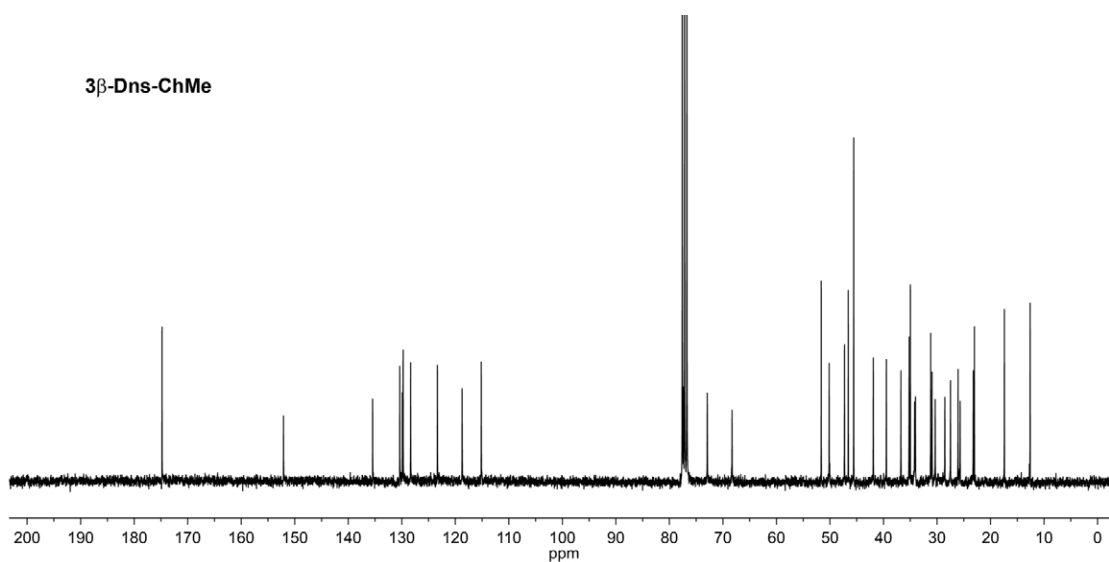

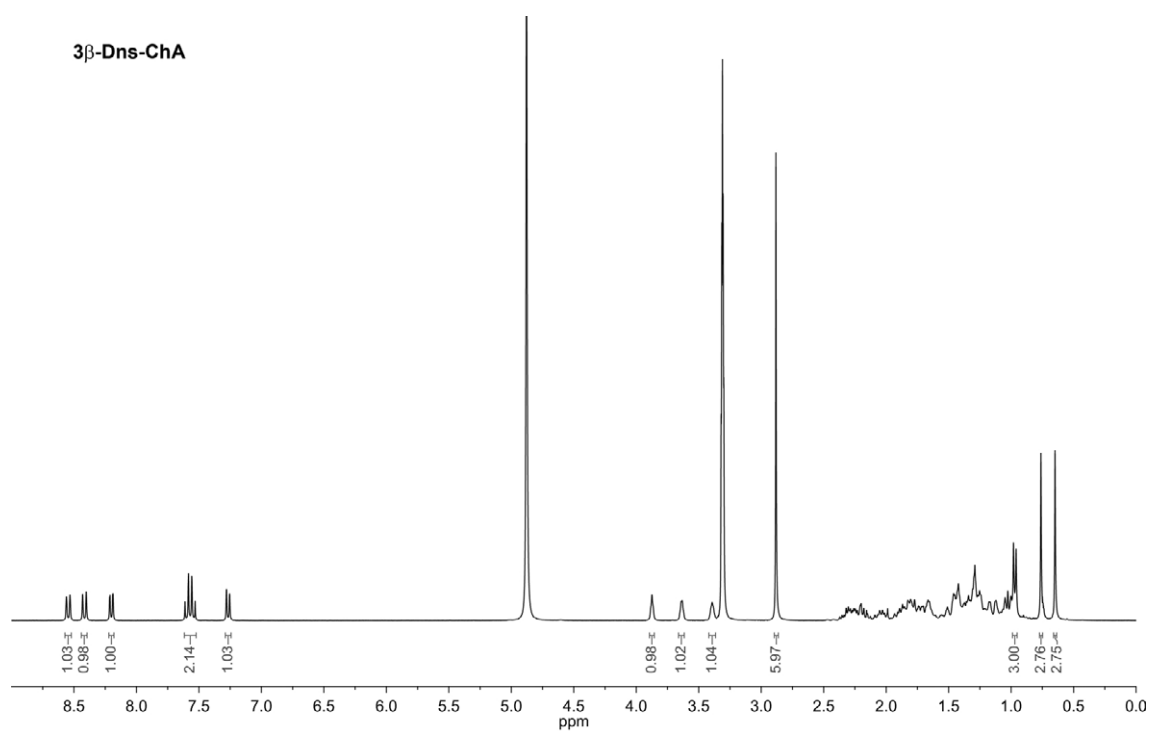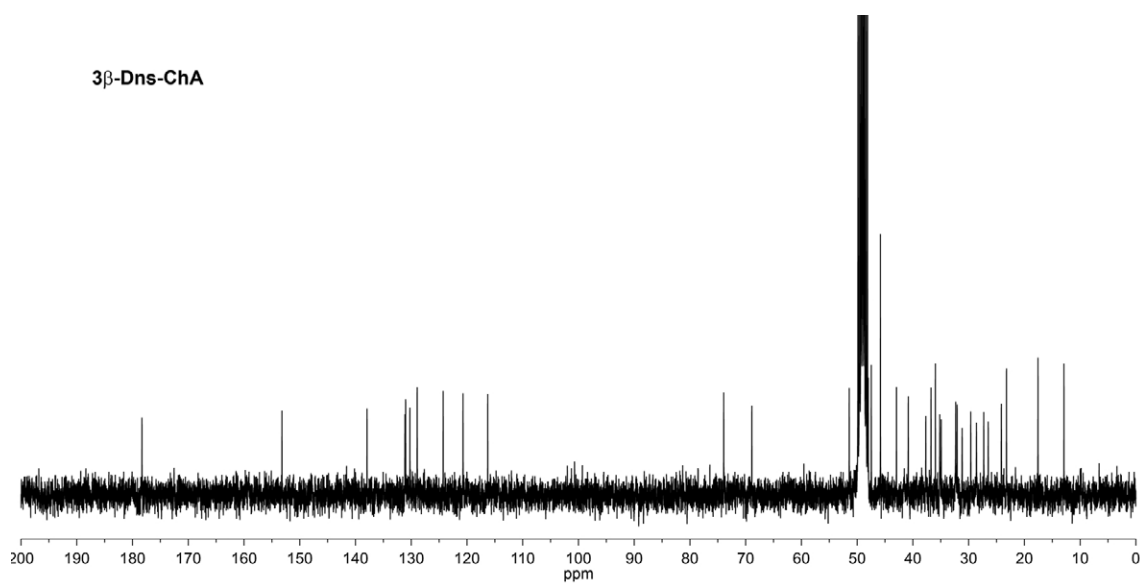

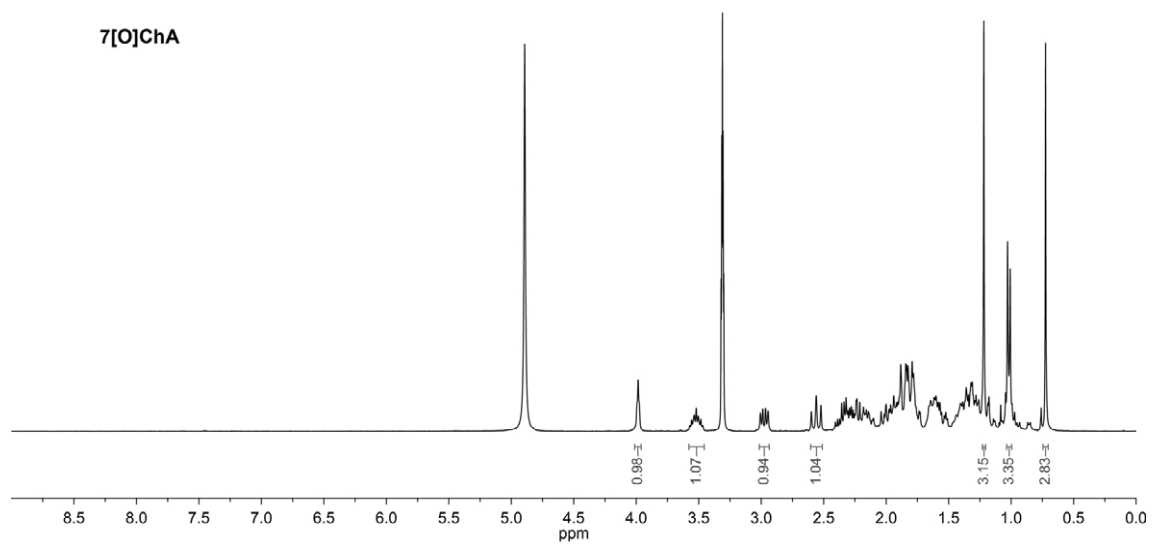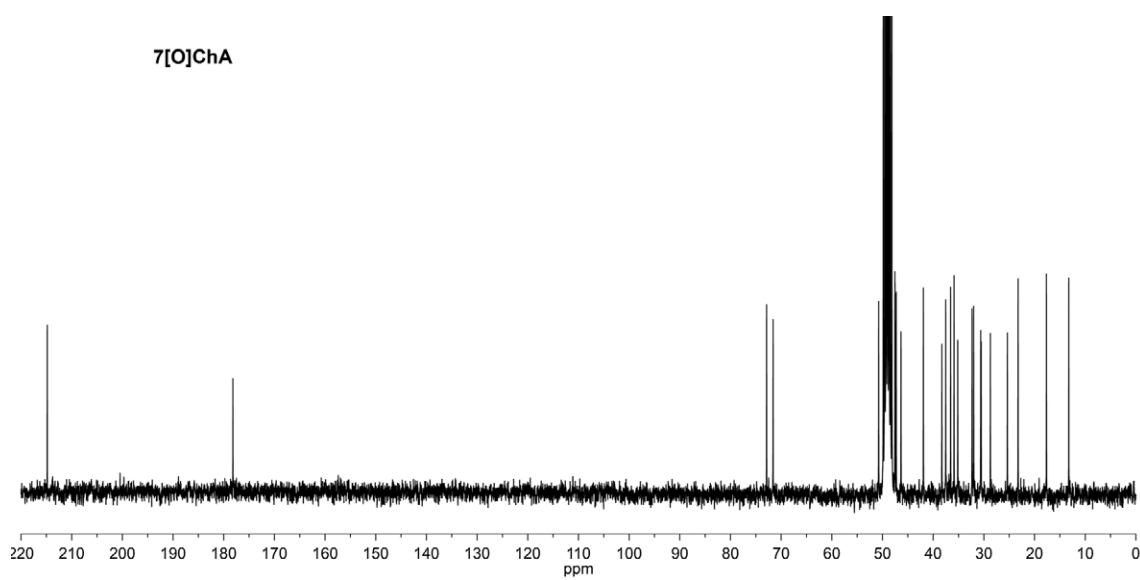

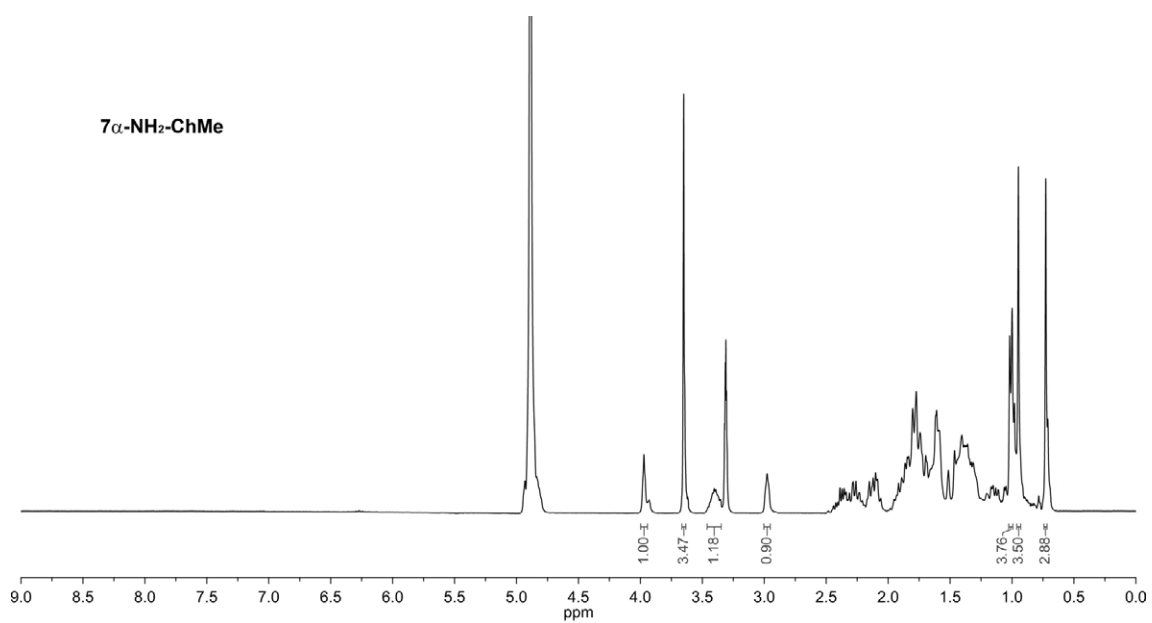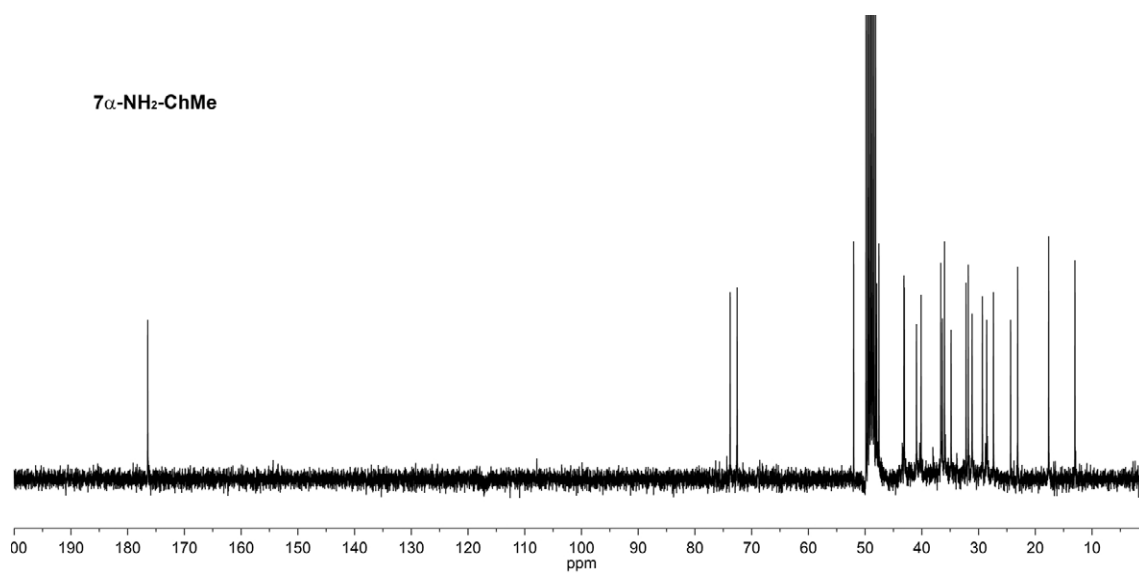

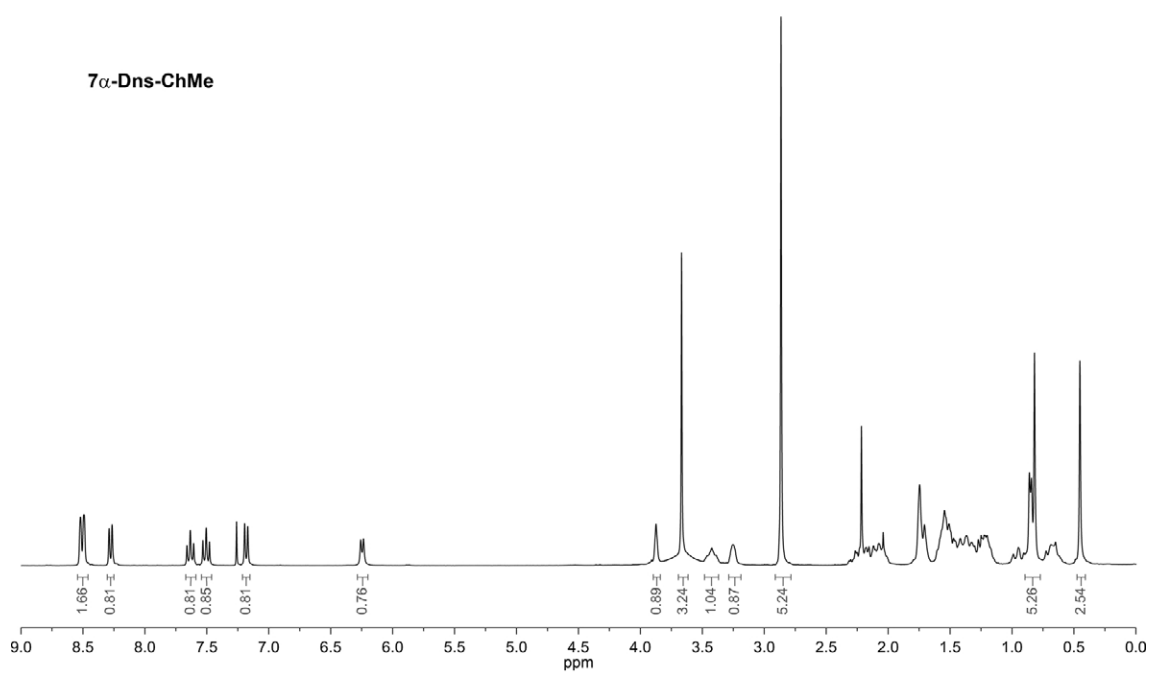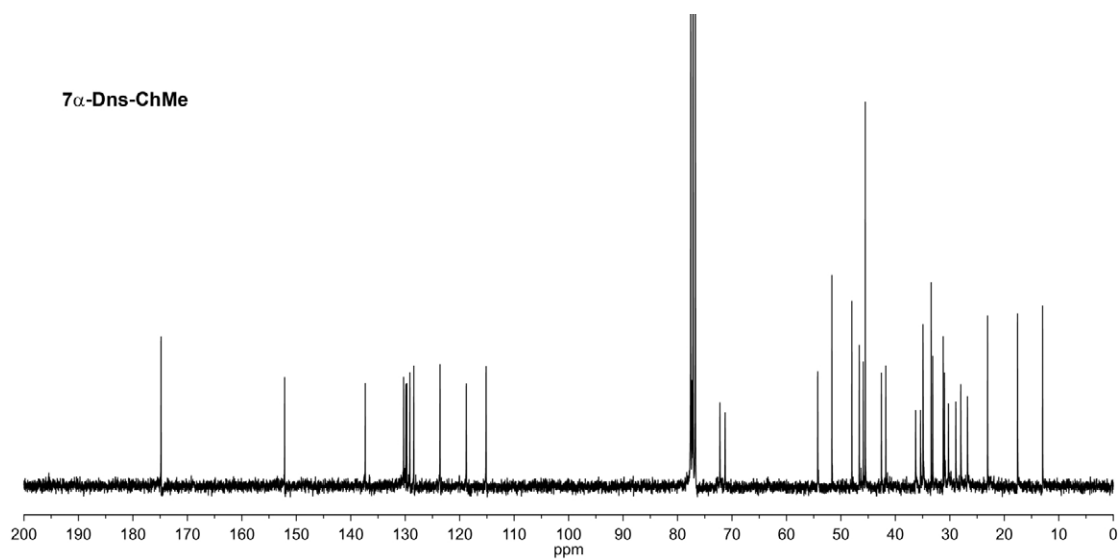

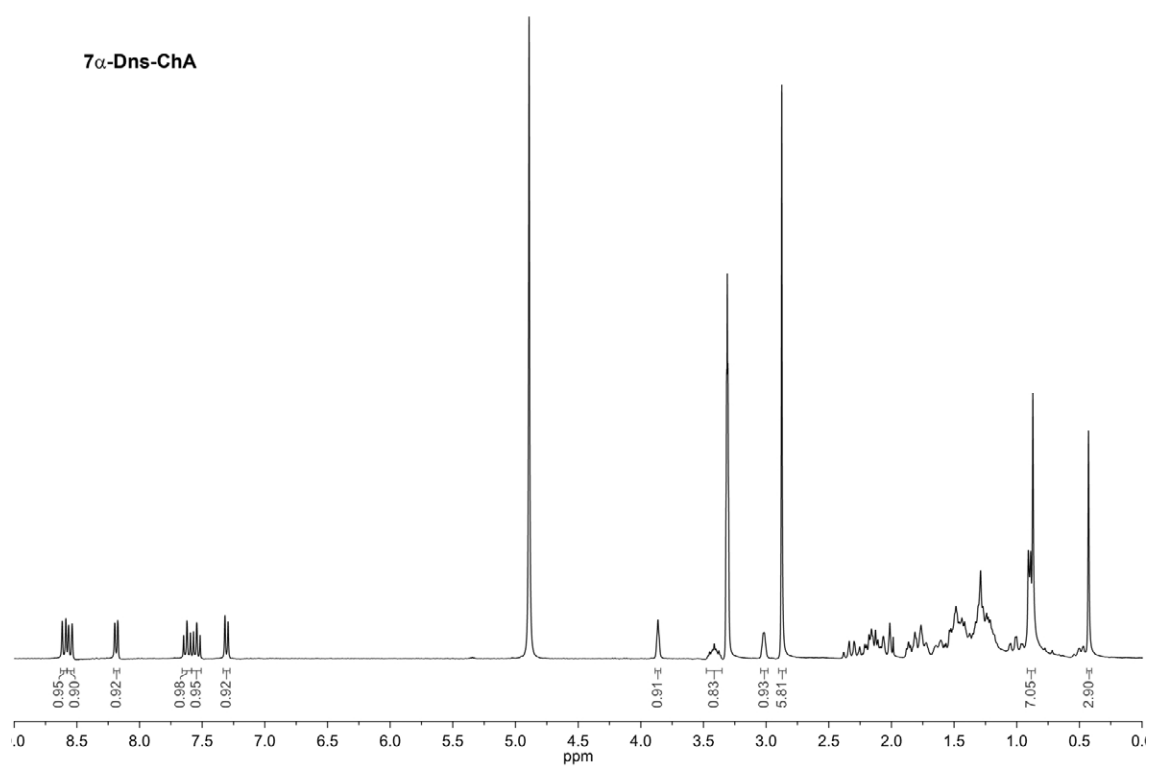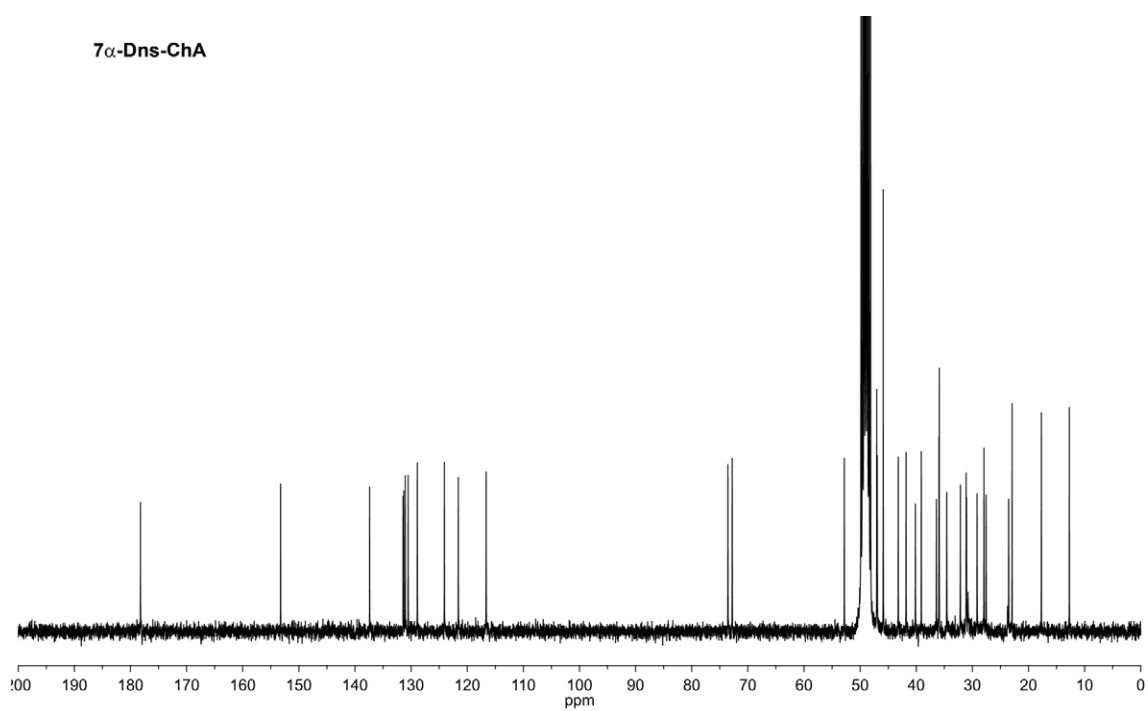

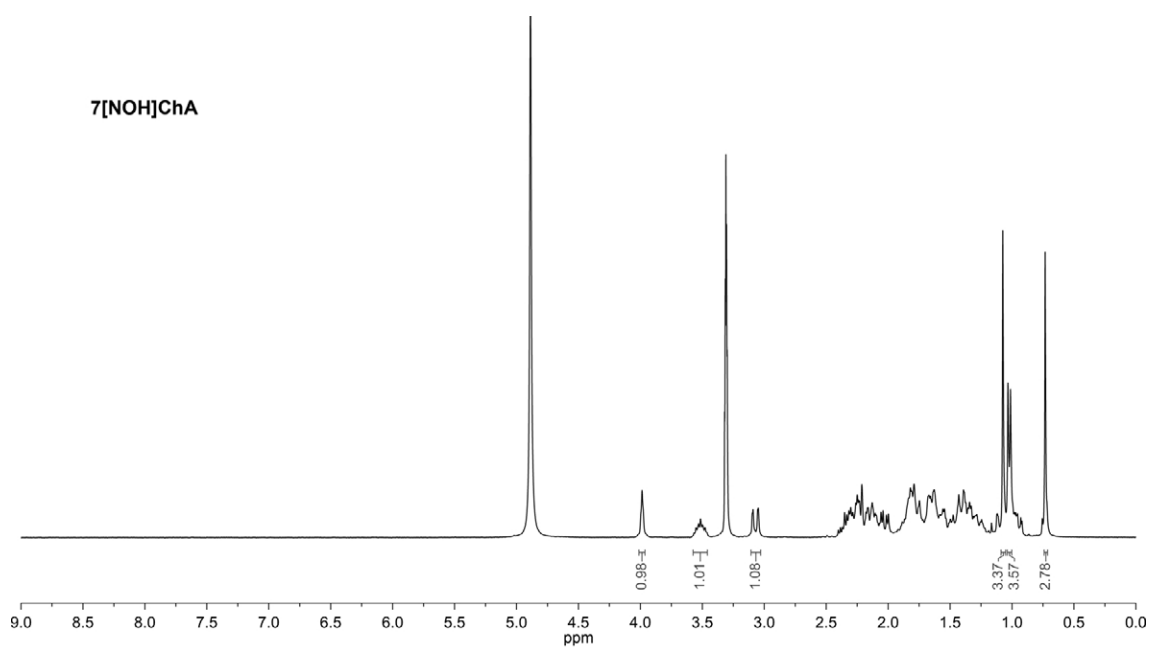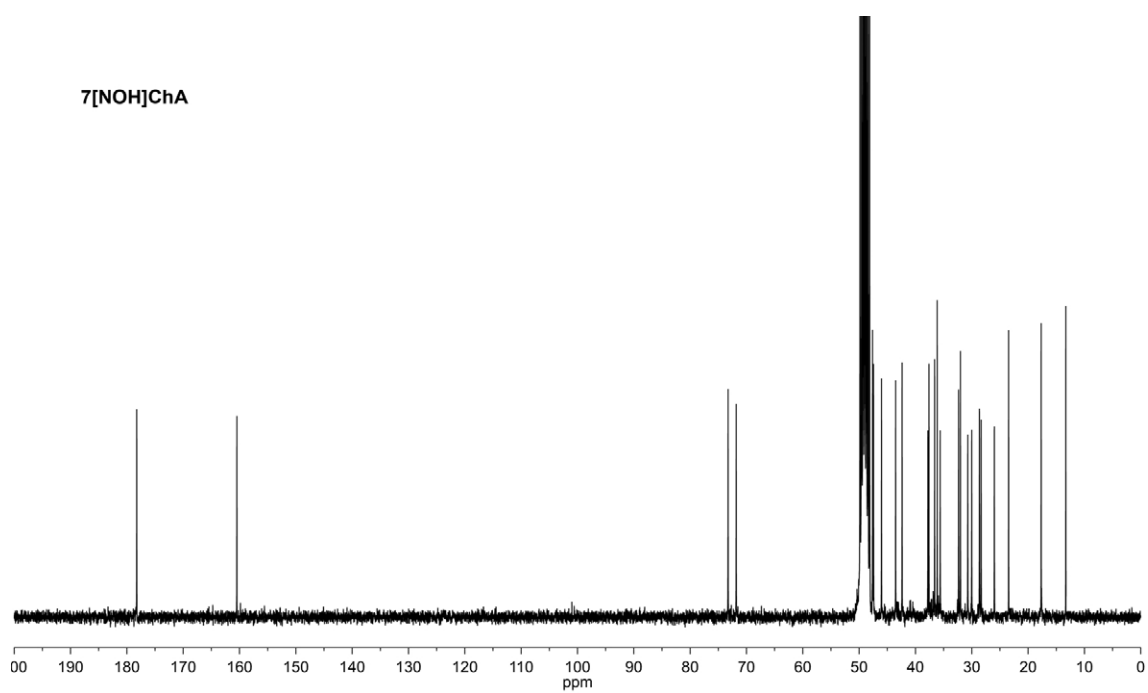

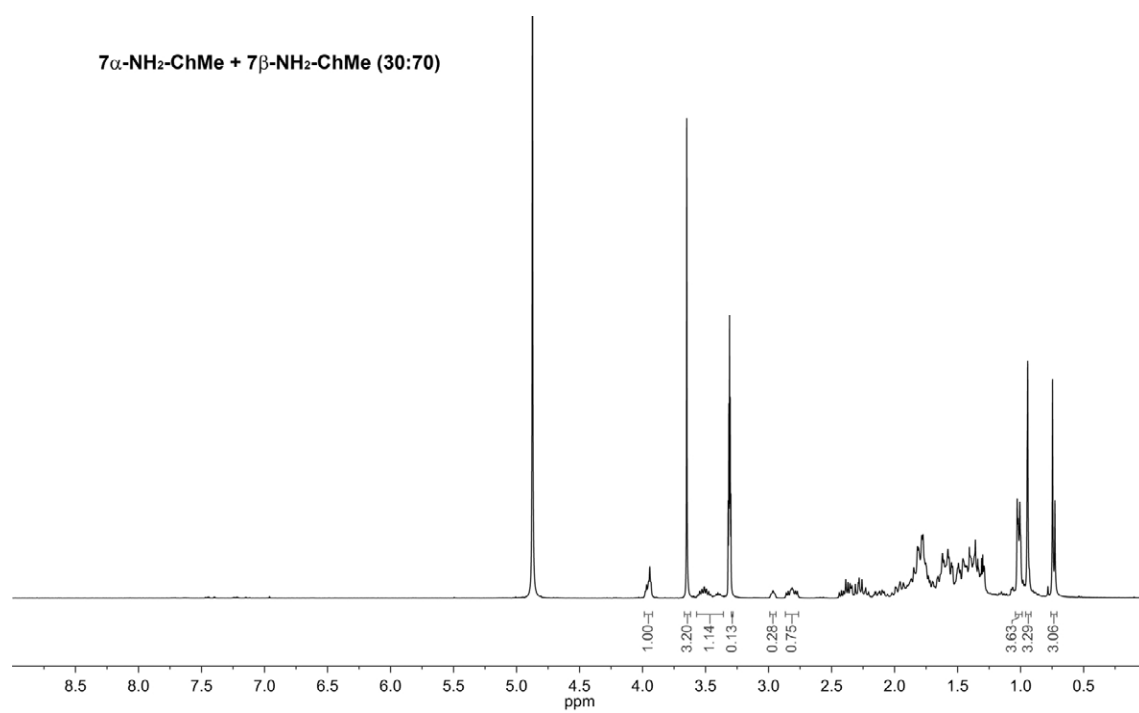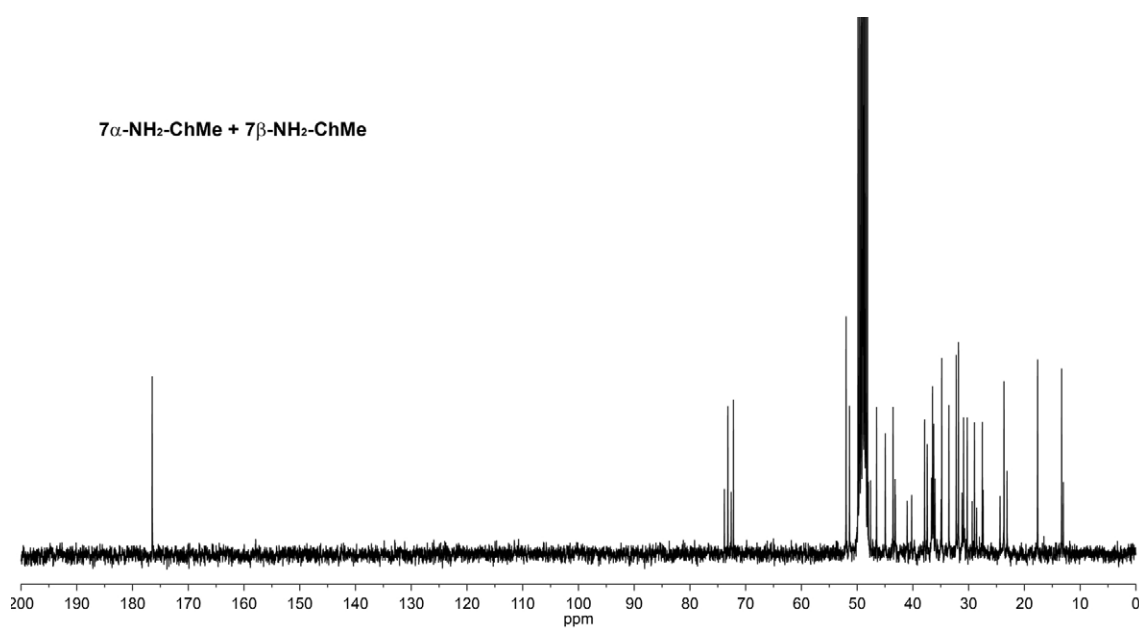



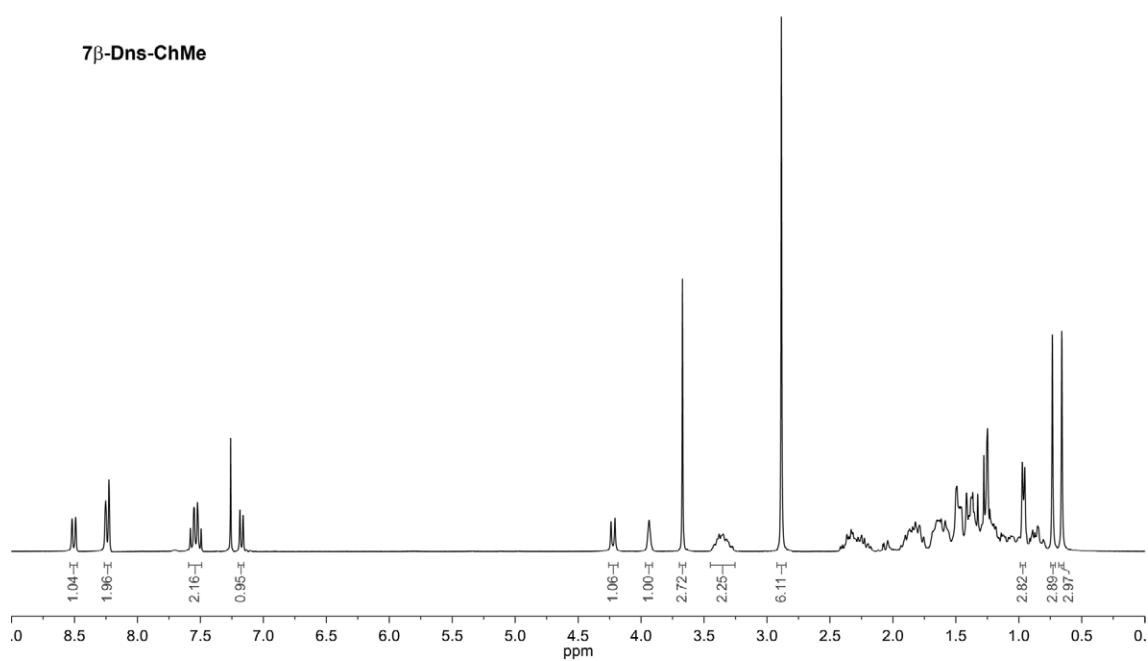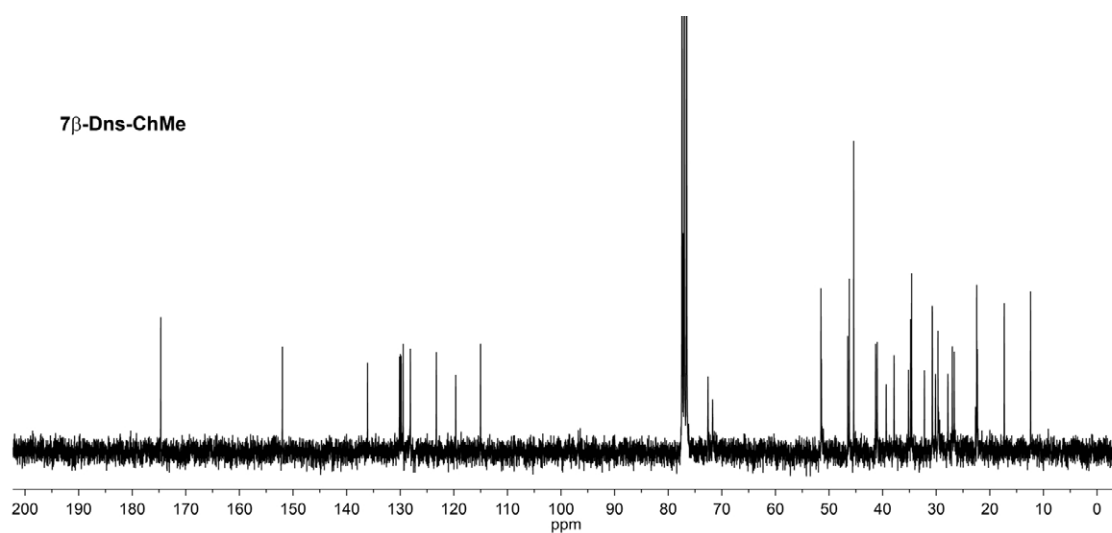

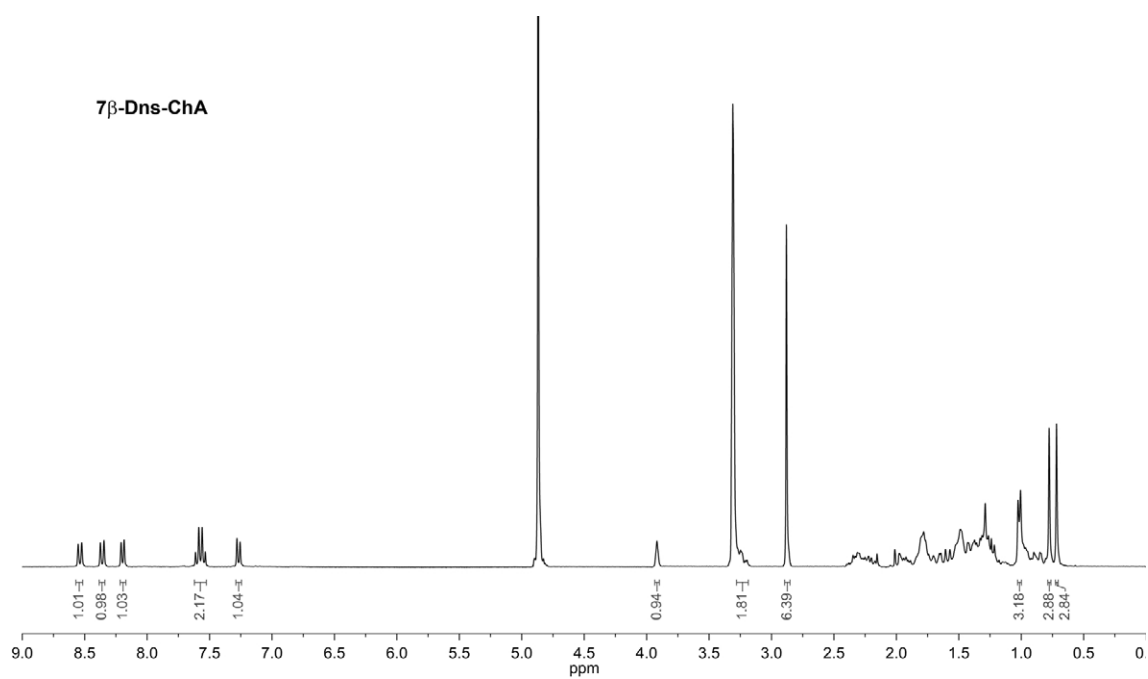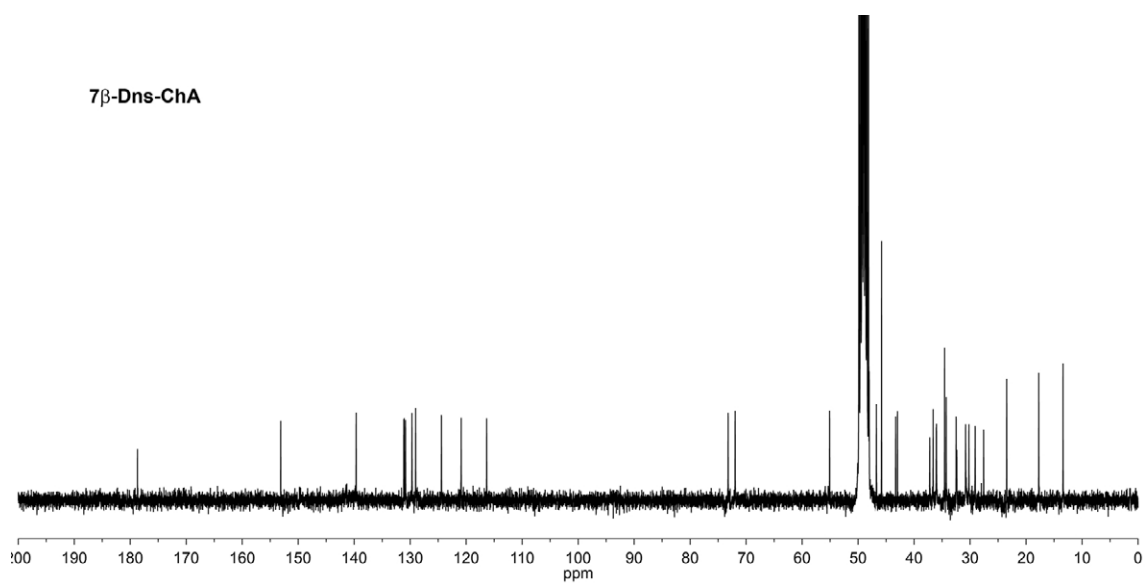

Supplement: b912134j.pdf [file b912134j.pdf]
